# Supplementary material for: An Exceptionally Facile Two-Step Structural Isomerization and Detoxication via a Water-Assisted Double Lossen Rearrangement
Source: PubMed Central journal article supplement (PMC5180244; doi:10.1038/srep39207), 2016-12-23
Supplement: srep39207-s1.pdf [file srep39207-s1.pdf]

Supporting Information

**An Exceptionally-Facile Two-Step Structural Isomerization and Detoxication via a Water-Assisted Double Lossen Rearrangement**

Feng Li<sup>1</sup>, Chun-Hua Huang<sup>1</sup>, Lin-Na Xie<sup>1</sup>, Na Qu<sup>1</sup>, Jie Shao<sup>1</sup>, Bo Shao<sup>1</sup> & Ben-Zhan Zhu<sup>\*,1,2</sup>

<sup>1</sup> State Key Laboratory of Environmental Chemistry and Eco-toxicology, Research Centre for Eco-environmental Sciences, the Chinese Academy of Sciences, Beijing 100085, PR China.

<sup>2</sup> Linus Pauling Institute, Oregon State University, Corvallis, OR 97331, USA

Correspondence and requests for materials should be addressed to B. Z. Z.  
(email:[bzhu@rcees.ac.cn](mailto:bzhu@rcees.ac.cn))

\*Corresponding author, E-mail: [bzhu@rcees.ac.cn](mailto:bzhu@rcees.ac.cn)

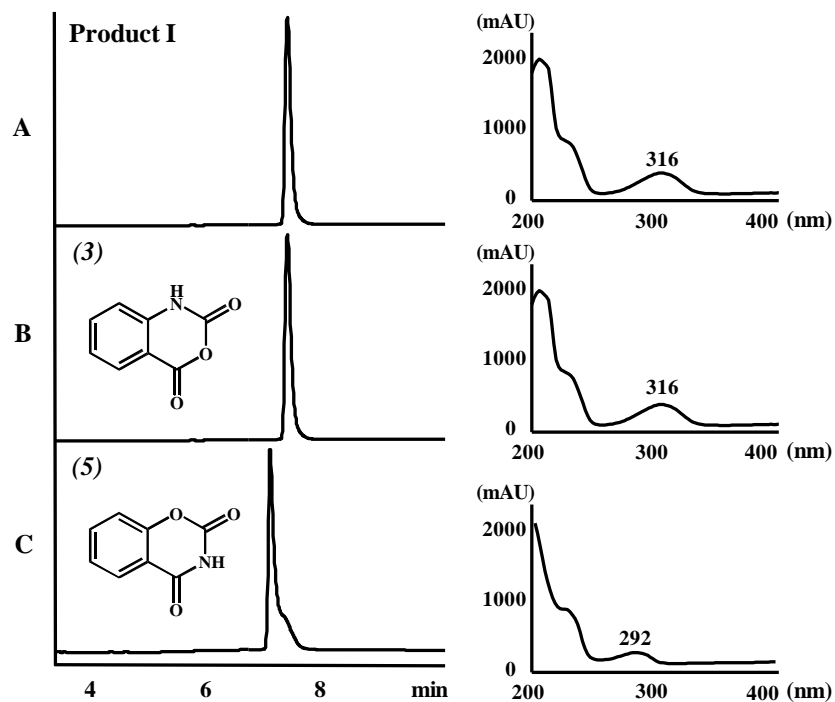

**Figure S1. Product I and (3) have the same retention time and UV spectrum, while the retention time and UV spectrum between Product I and (5) are different. These HPLC data show that Product I is (3). (A) Product I. (B) (3) (Isatoic anhydride). (C) (5).**

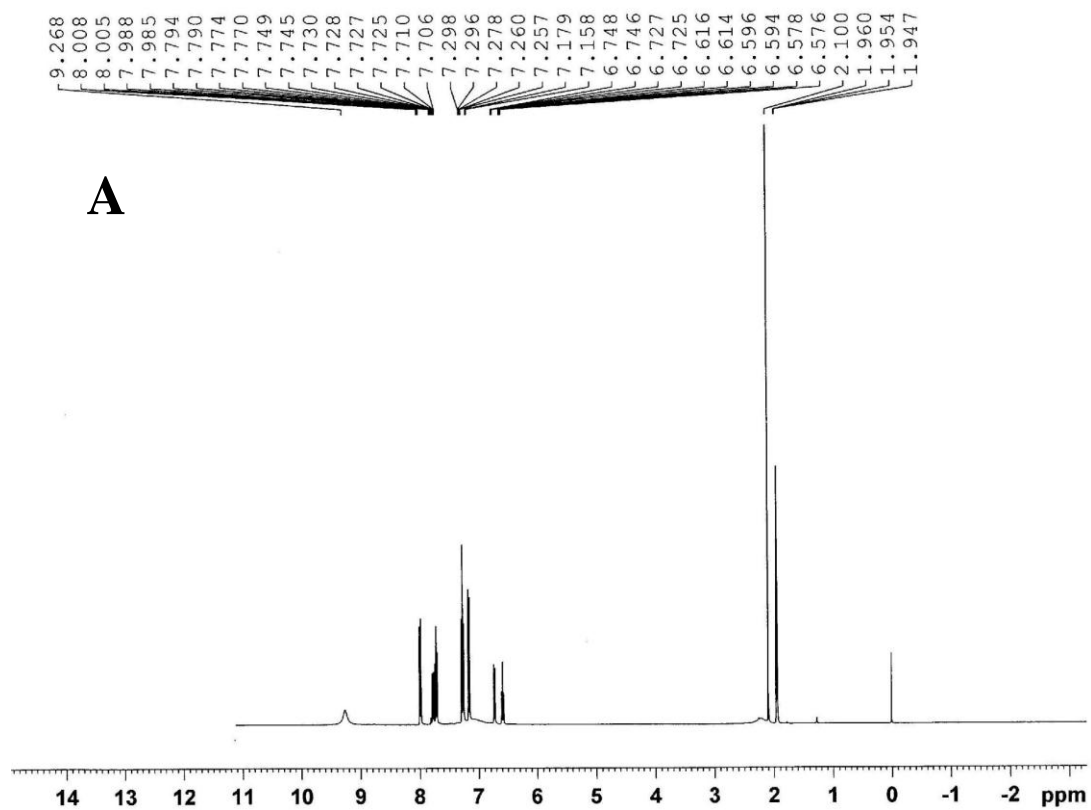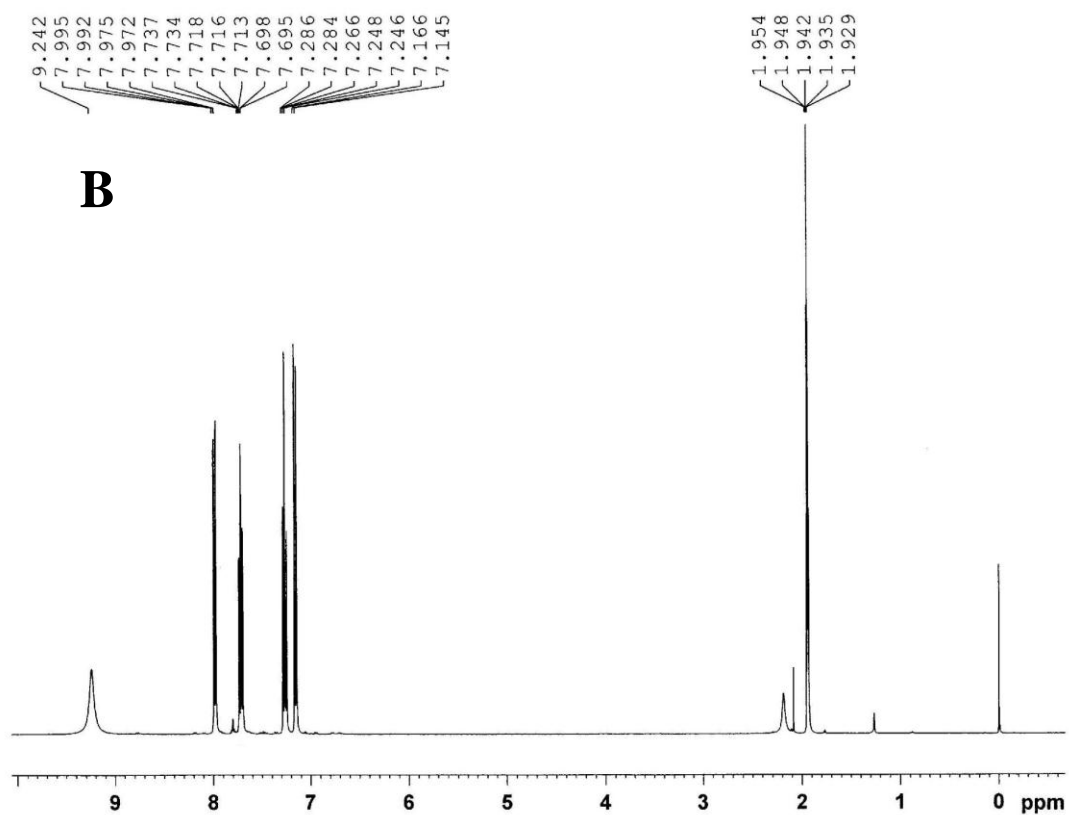

**Figure S2. NMR spectra of (A) isolated Product I; (B) authentic isatoic anhydride.**

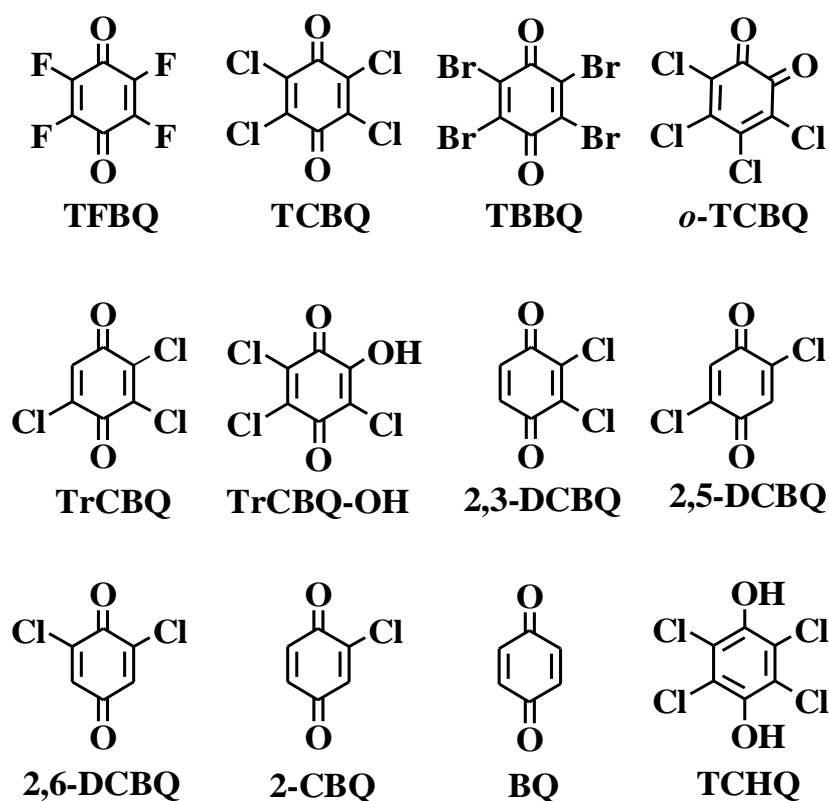

**Figure S3.** Chemical structures of halogenated quinoid compounds used in this study.

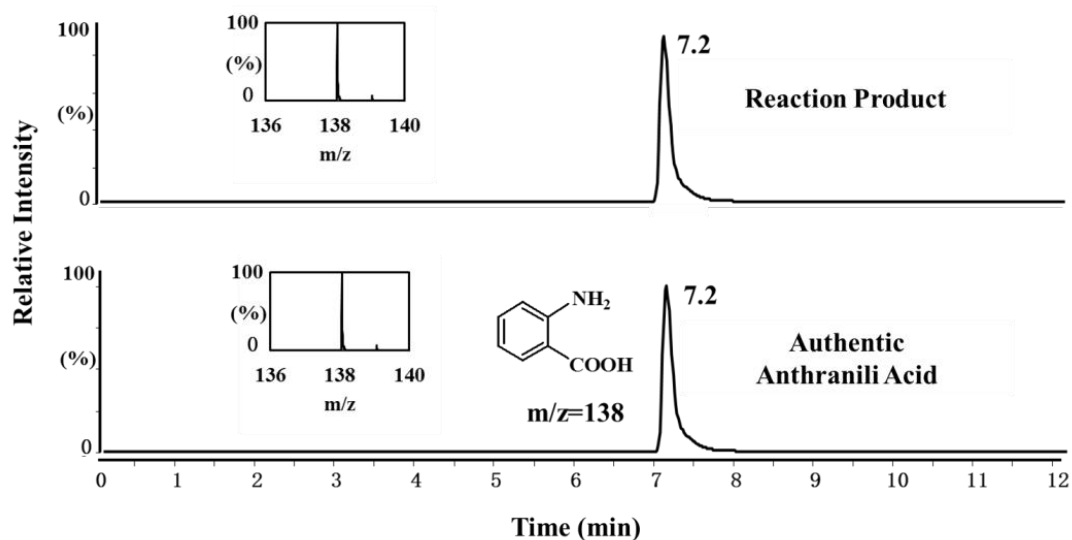

**Figure S4.** The hydrolysis product of IA is confirmed to be anthranilic acid (AA) by comparison with the authentic standard. The hydrolysis product of IA shows the same retention time and *m/z* in the HPLC-MS data.

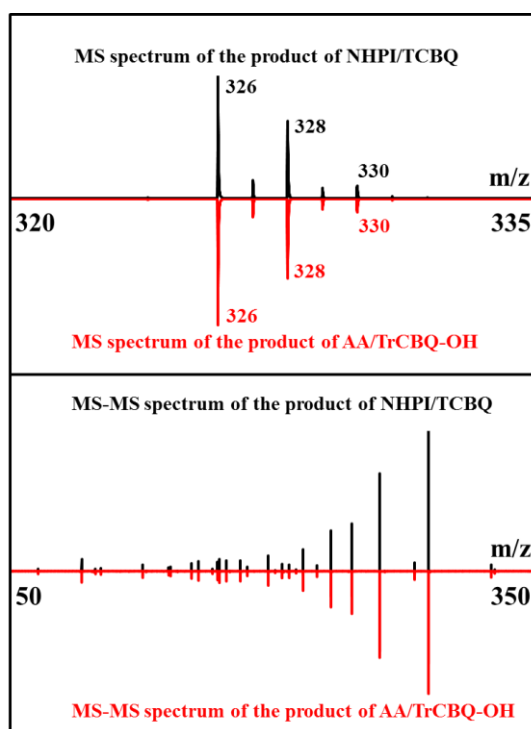

**Figure S5. The MS and MSMS spectra of Product II.** The MS and MSMS data of Product II of NHPI/TCBQ match well with those of the reaction of AA/TrCBQ-OH, which means that Product II is as the same as the nucleophilic product of AA/TrCBQ-OH.

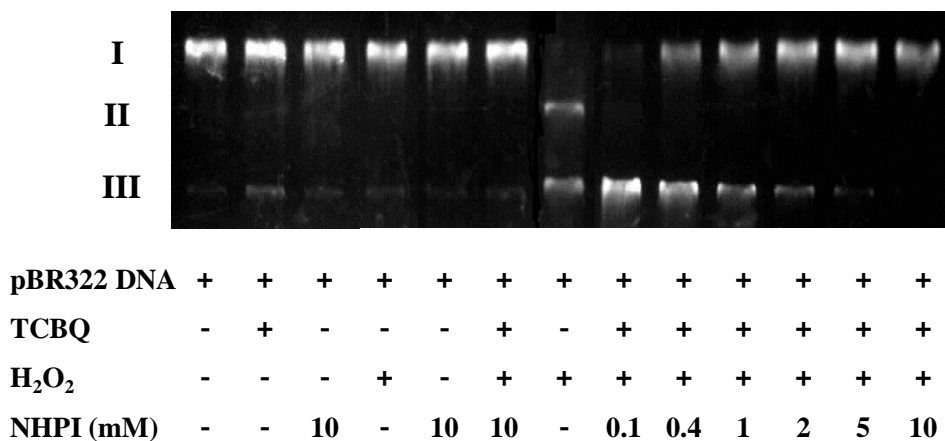

**Figure S6. Protection by NHPI against TCBQ/H<sub>2</sub>O<sub>2</sub>-induced DNA damage.** The concentrations: pBR322 DNA, 5 $\mu$ g/mL; TCBQ, 0.1 mM; H<sub>2</sub>O<sub>2</sub>, 10 mM.

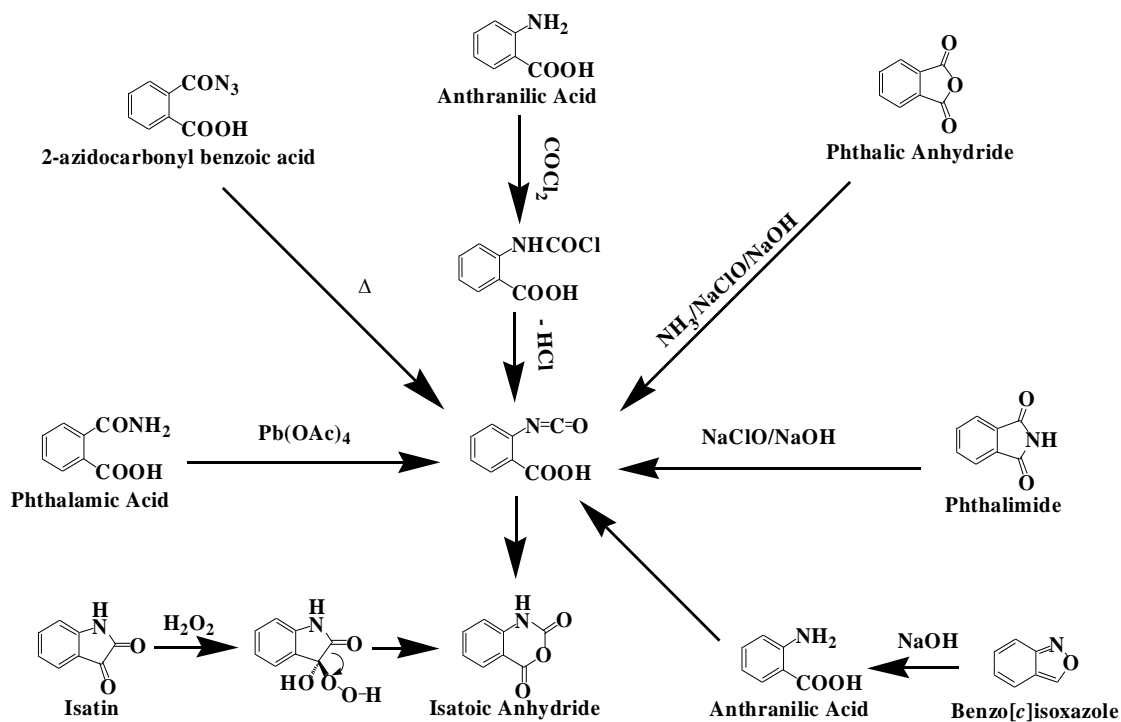

**Scheme S1.** The most commonly-used methods for the synthesis of isatoic anhydride.

**Table S1.** The FT-ICR-MS data of the products of the reaction of NHPI and TCBQ.

| Meas. m/z | # | Formula                                                        | Score | m/z       | Err [mDa] | Err [ppm] | mSigma | rdb  | E?conf | N-rule |
|-----------|---|----------------------------------------------------------------|-------|-----------|-----------|-----------|--------|------|--------|--------|
| 162.01966 | 1 | C <sub>8</sub> H <sub>4</sub> NO <sub>3</sub>                  | 100.0 | 162.01967 | 0.00      | 0.02      | 9.1    | 7.5  | Even   | Ok     |
| 325.96277 | 2 | C <sub>13</sub> H <sub>6</sub> Cl <sub>2</sub> NO <sub>5</sub> | 100.0 | 325.96285 | 0.08      | 0.26      | 28.3   | 10.5 | Even   | Ok     |
| 351.94198 | 3 | C <sub>14</sub> H <sub>4</sub> Cl <sub>2</sub> NO <sub>6</sub> | 100.0 | 351.94212 | 0.14      | 0.39      | 90.1   | 12.5 | Even   | Ok     |
